# Supplementary material for: Synthesis and In Vitro Characterization of Selective Cannabinoid CB2 Receptor Agonists: Biological Evaluation against Neuroblastoma Cancer Cells
Source: MDPI journal article supplement (doi:10.3390/molecules27093019), 2022-05-07

# Supporting Information

## Synthesis and In vitro Characterization of Selective Cannabinoid CB2 receptor Agonists: Biological Evaluation against Neuroblastoma Cancer Cells

Francesca Gado <sup>1,#,ϕ</sup>, Rebecca Ferrisi <sup>1,#</sup>, Sarah Di Somma <sup>2</sup>, Fabiana Napolitano <sup>2</sup>, Kawthar A. Mohamed <sup>3</sup>, Lesley A. Stevenson <sup>4</sup>, Simona Rapposelli <sup>1</sup>, Giuseppe Saccomanni <sup>1</sup>, Giuseppe Portella <sup>2</sup>, Roger G. Pertwee <sup>4</sup>, Robert B. Laprairie <sup>3,5</sup>, Anna Maria Malfitano <sup>2,\*</sup>, Clementina Manera <sup>1,\*</sup>

<sup>1</sup> Department of Pharmacy, University of Pisa, Italy; rebecca.ferrisi@phd.unipi.it (R.F.); simona.rapposelli@unipi.it (S.R.); giuseppe.sacomanni@unipi.it (G.S.); clementina.manera@unipi.it (C.M.)

<sup>2</sup> Department of Translational Medical Sciences, University of Naples Federico II, Italy; annamaria.malfitano@unina.it (A.M.M.); giuseppe.portella@unina.it (G.P.); sarah.disomma@unina.it (S.D.S.); fabiana.napolitano2@unina.it (F.N.);

<sup>3</sup> College of Pharmacy and Nutrition, University of Saskatchewan, Canada; kam913@mail.usask.ca (K.A.M.); robert.laprairie@usask.ca (R.B.L.);

<sup>4</sup> Institute of Medical Sciences, University of Aberdeen, UK; l.a.stevenson@abdn.ac.uk (L.A.S.); rgp@abdn.ac.uk (R.G.P.);

<sup>5</sup> Department of Pharmacology, College of Medicine, Dalhousie University, Canada; robert.laprairie@usask.ca (R.B.L.);

### CONTENTS OF SUPPORTING INFORMATION

S2-S7    <sup>1</sup>H- and <sup>13</sup>C-NMR Spectra of compounds **FG158a-trans**, **FG158a-cis**, **FG160a-trans**, **FG160a-cis**, **FG161a-trans**, and **FG161a-cis**.

FG158a *cis*  $^1\text{H}$ -NMR

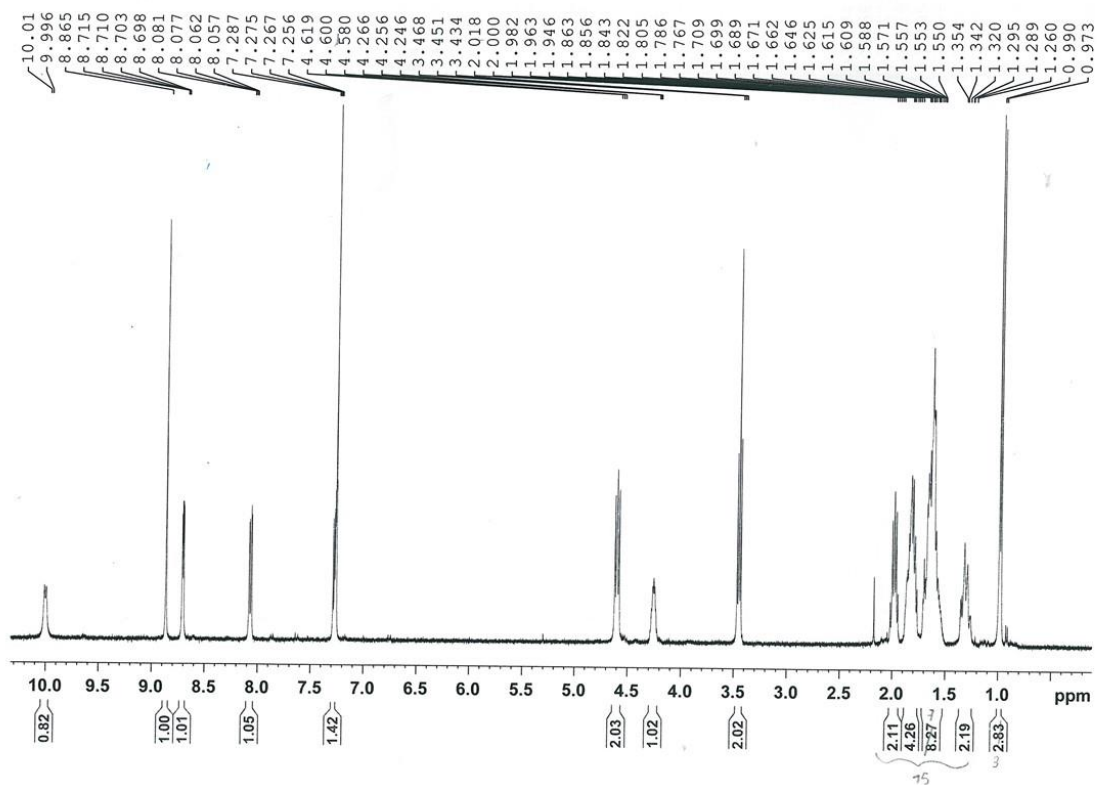

FG158a *trans*  $^1\text{H}$ -NMR

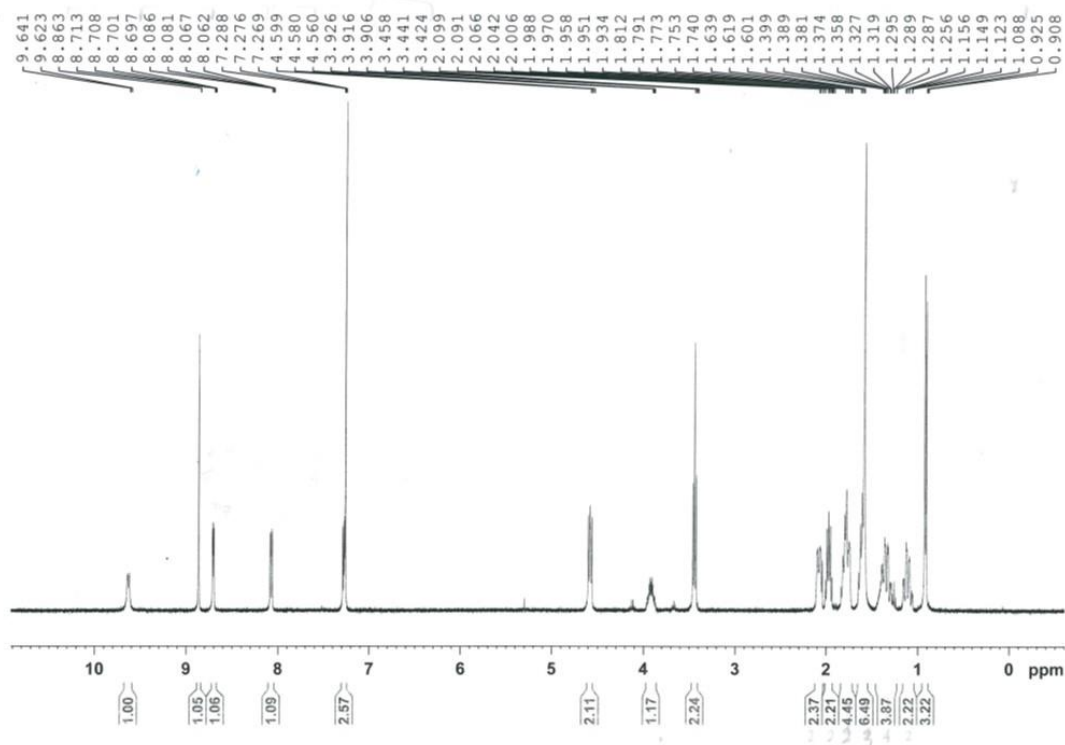

FG158a *cis*  $^{13}\text{C}$ -NMR

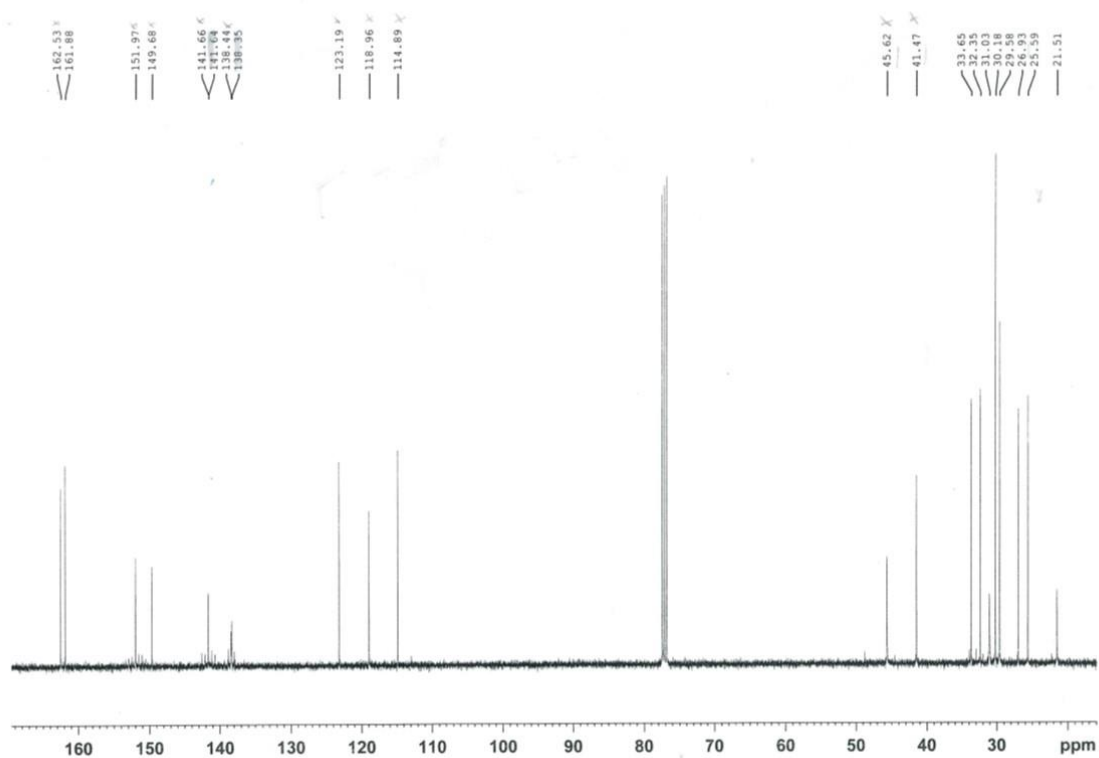

FG158a *trans*  $^{13}\text{C}$ -NMR

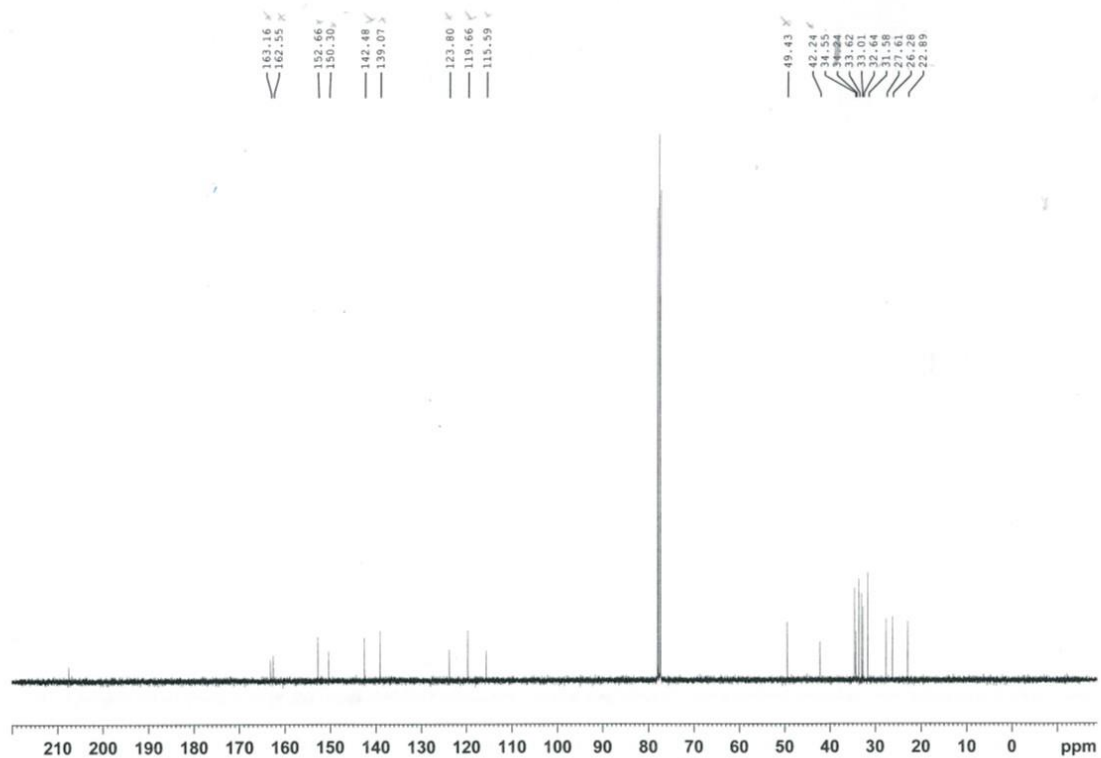

FG160a *cis*  $^1\text{H}$ -NMR

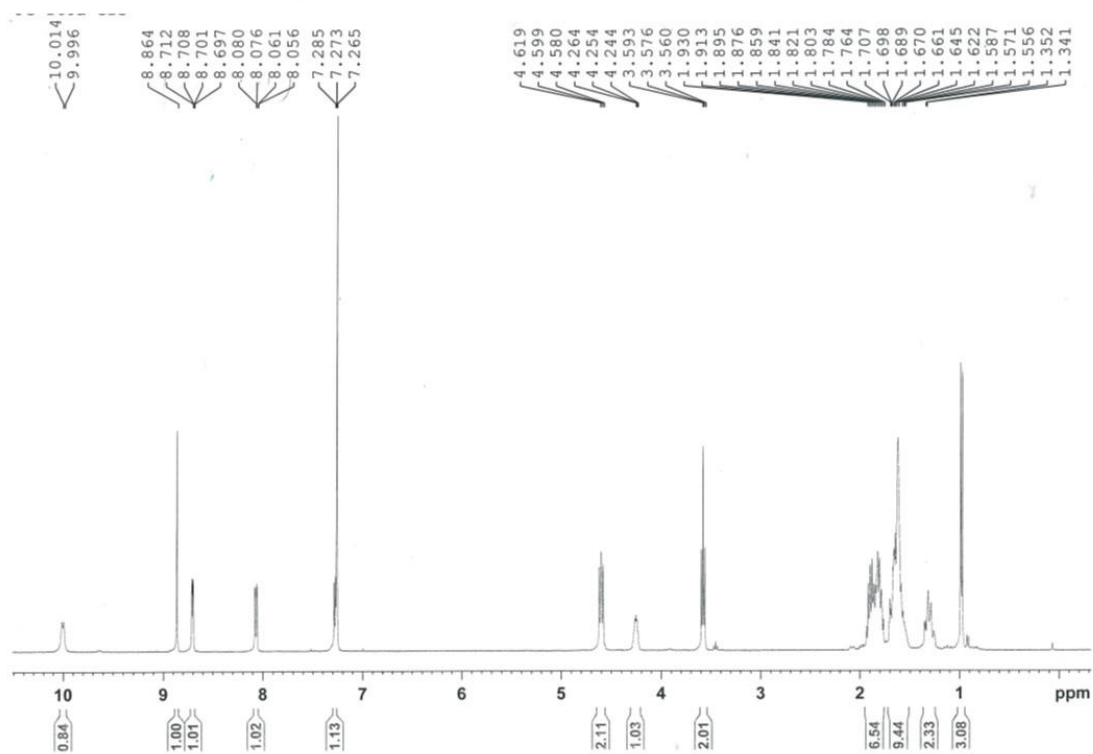

FG160a *trans*  $^1\text{H}$ -NMR

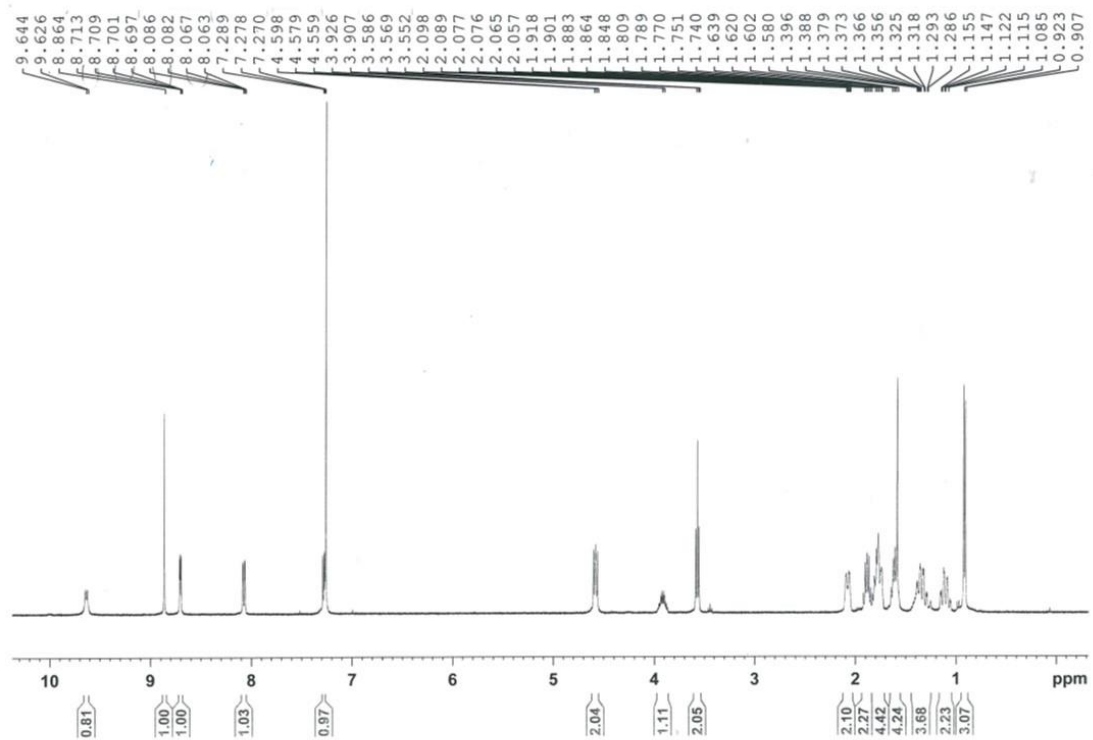

FG160a *cis*  $^{13}\text{C}$ -NMR

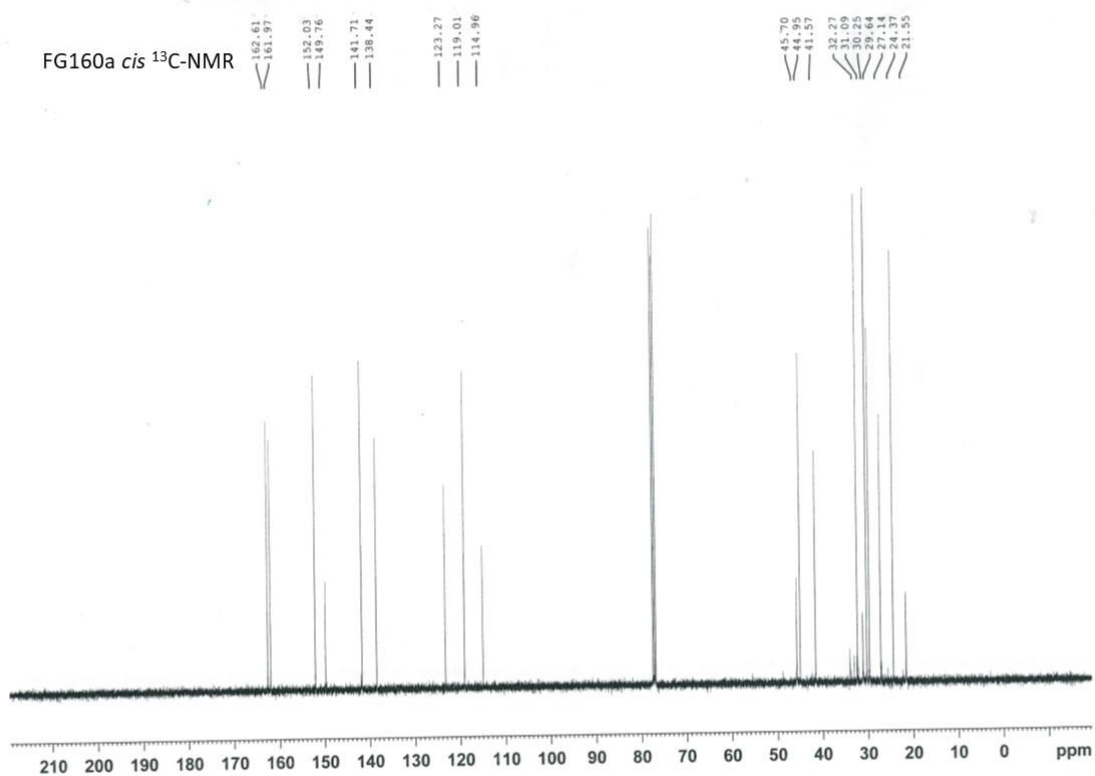

FG160a *trans*  $^{13}\text{C}$ -NMR

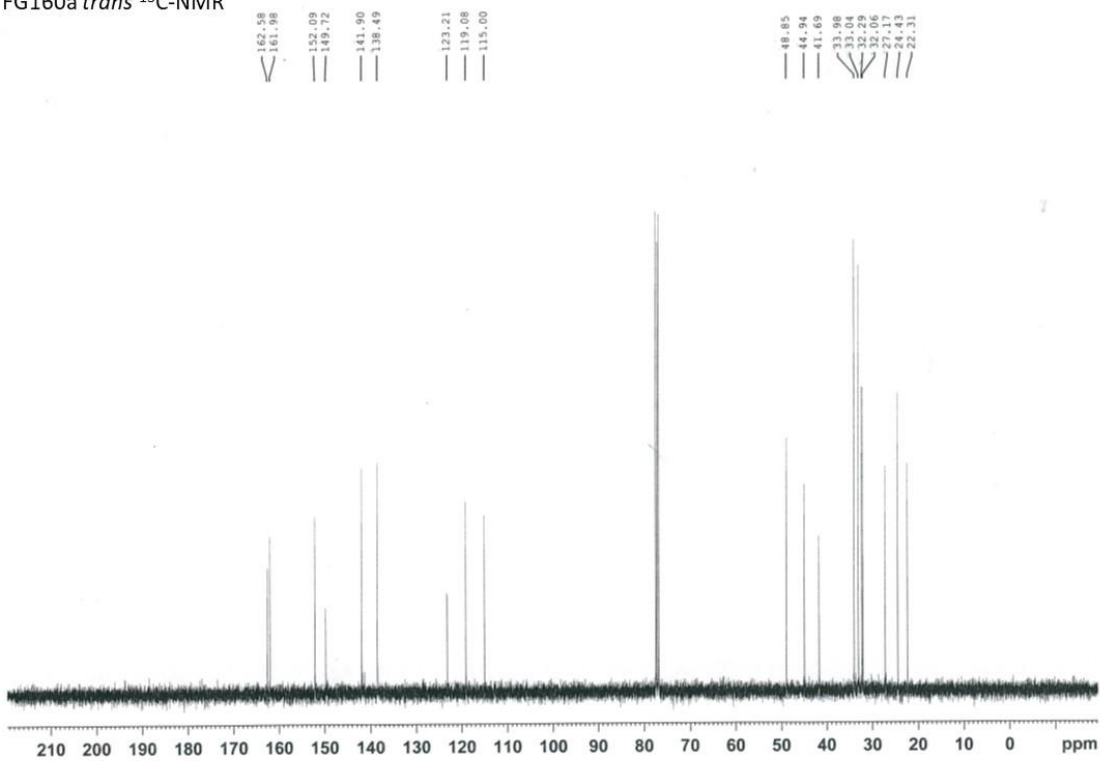

FG161a *cis*  $^1\text{H}$ -NMR

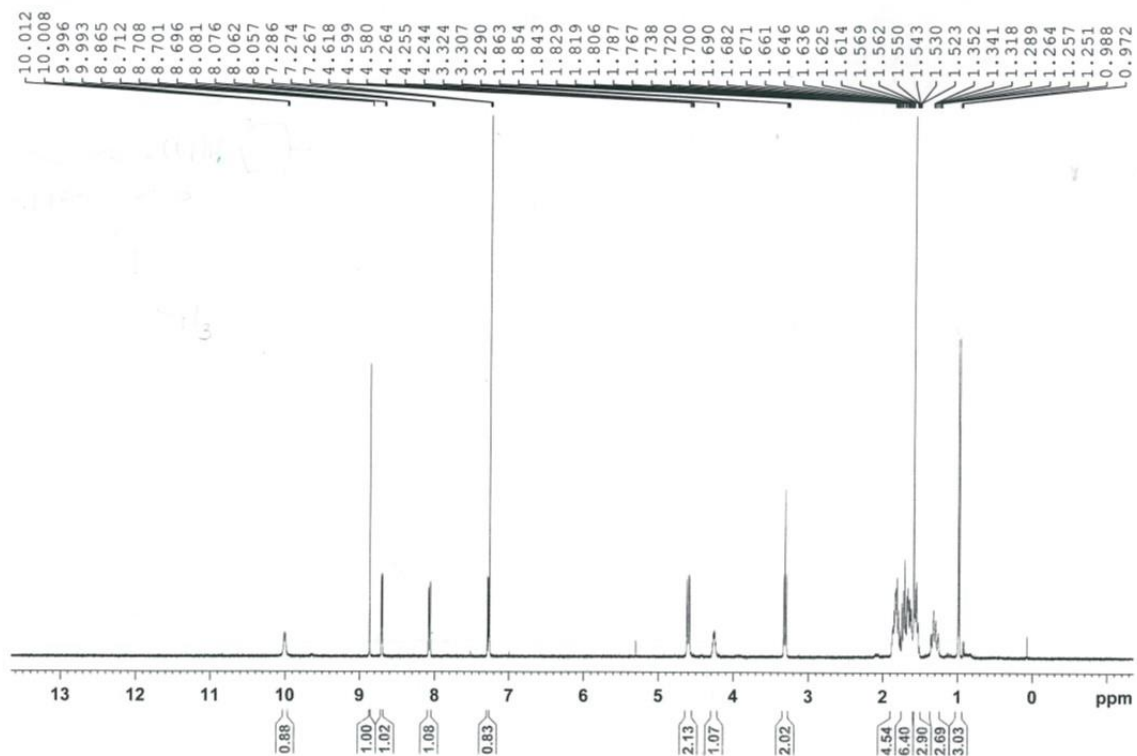

FG161a *trans*  $^1\text{H}$ -NMR

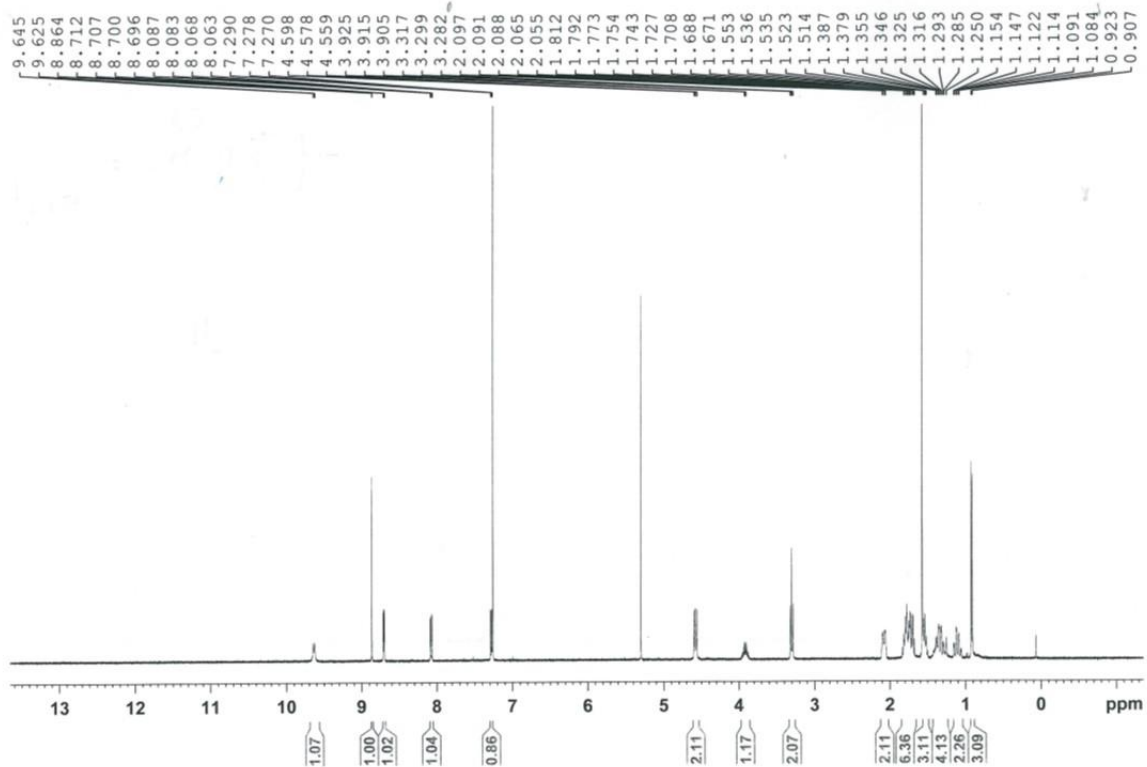

FG161a *cis*  $^{13}\text{C}$ -NMR

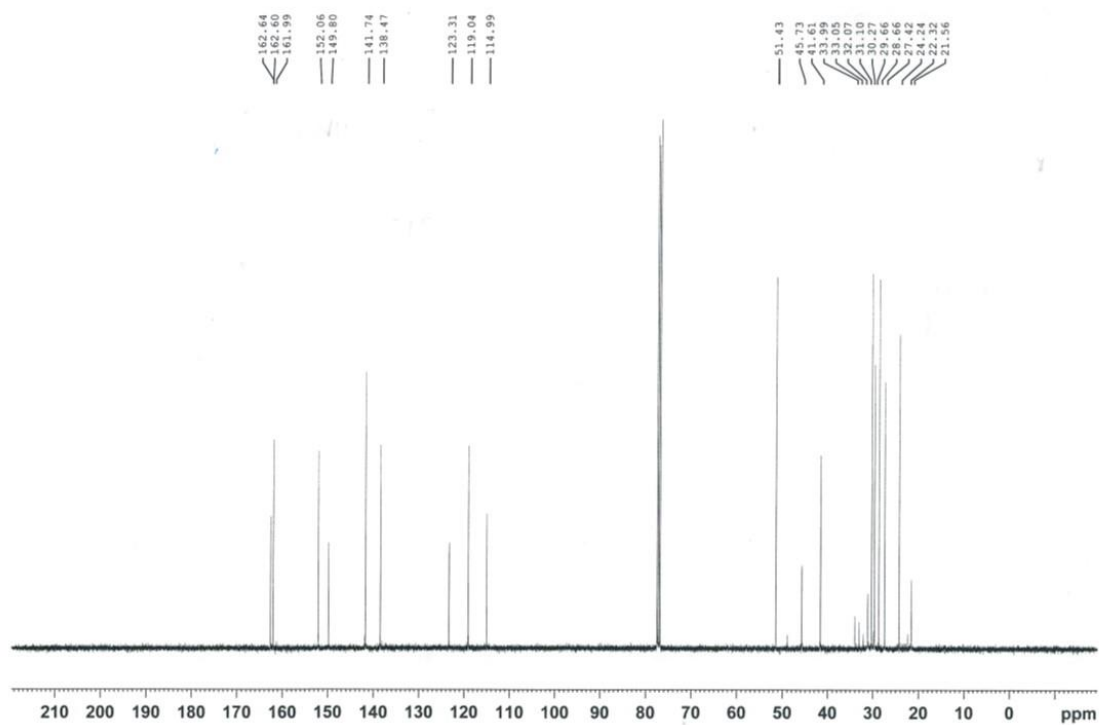

FG161a *trans*  $^{13}\text{C}$ -NMR

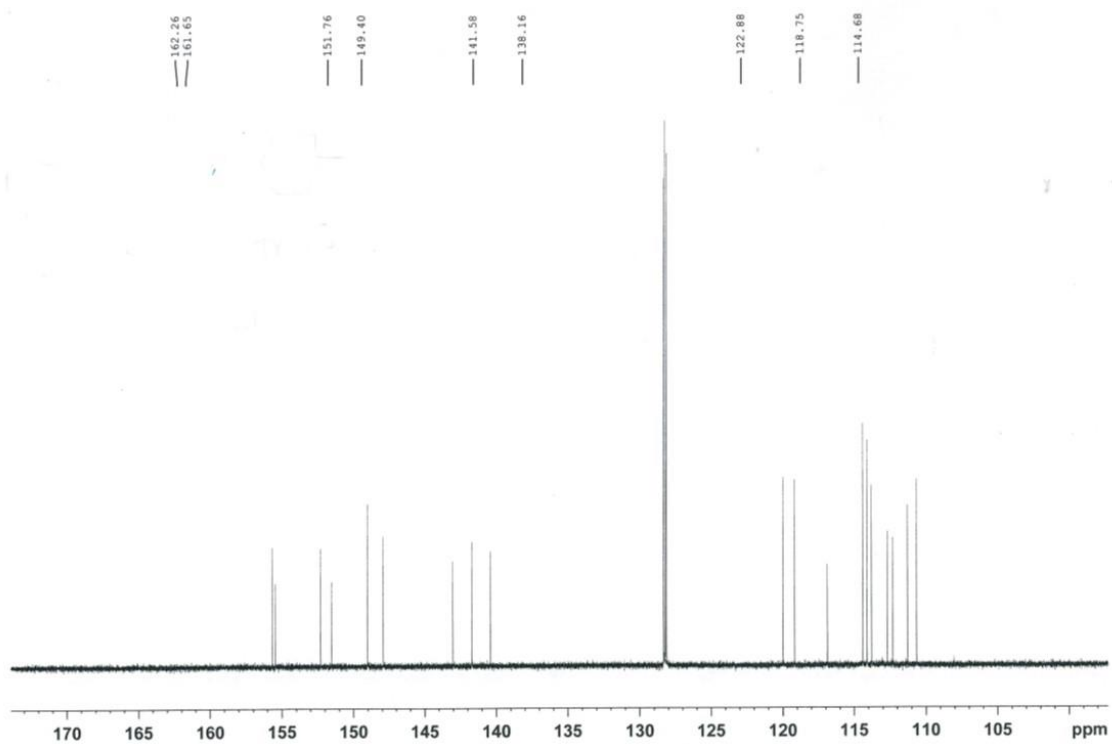

Supplement: s1 [file s1]
